# Supplementary material for: Clinical characteristics and spectrum of NF1 mutations in 12 unrelated Chinese families with neurofibromatosis type 1
Source: Springer Nature journal article supplement (doi:10.1186/s12881-018-0615-8), 2018-06-18
Supplement: MOESM1 [file 15854198]

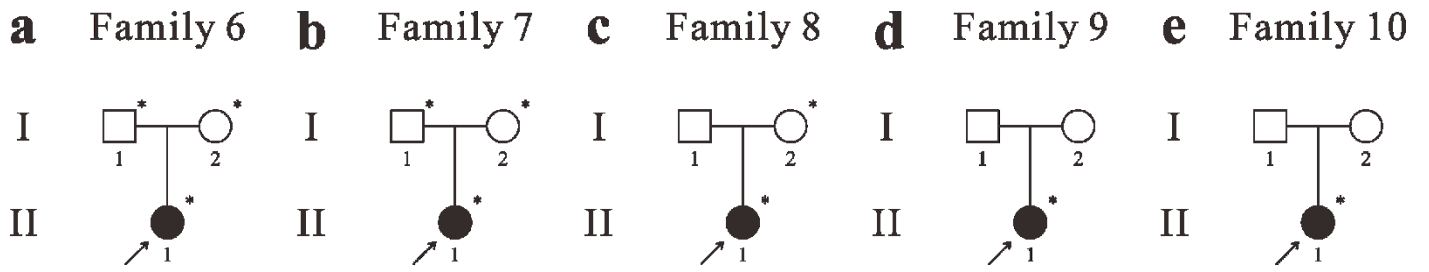

**Fig. S1** Pedigrees of families of sporadic cases. The arrows indicate the probands in each family. The asterisks denote that peripheral blood samples of individuals had been acquired. **a–e**: Pedigrees of Families 6–10

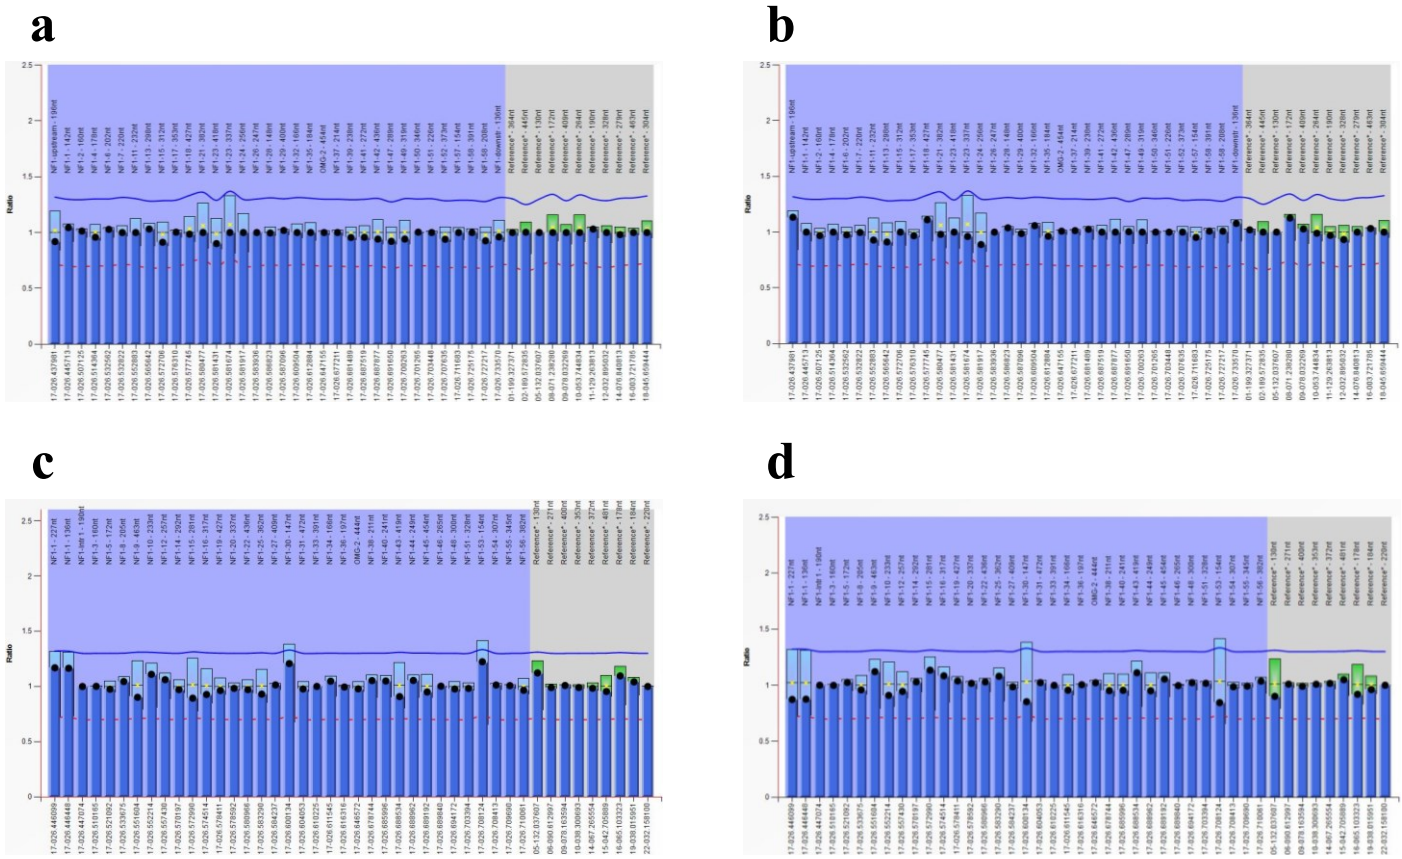

**Fig.S2** Multiplex ligation-dependent probe amplification (MLPA) results of P081 and P082 for patients in Family 12. **a**: MLPA results of P081 for Patient 22; **b**: MLPA results of P081 for Patient 23; **c**: MLPA results of P082 for Patient 22; **d**: MLPA results of P082 for Patient 23

| <b>a</b>   |                                            | 629     |
|------------|--------------------------------------------|---------|
|            |                                            | ***** * |
| Human      | KFLLKNKQADRSSCHFLFLFYGVGCDIPSSGNTSQMSMDHEE |         |
| Chimpanzee | KFLLKNKQADRSSCHFLFLFYGVGCDIPSSGNTSQMSMDHEE |         |
| Rhesus     | KFLLKNKQADRSSCHFLFLFYGVGCDIPSSGNTSQMSMDHEE |         |
| Bat        | KFLLKNKQADRSS--FLFLYGGGCDVPSSGNTSQMSMDHEE  |         |
| Dog        | KFLLKNKQADRSSCHFLFLFYGVGCDVPSSGTTSQMSMDHEE |         |
| Rabbit     | KFLLKNKQADRSSCHFLYLYGVGCDVPSSGNTSQMSMDHEE  |         |
| Mouse      | KFLLKNKQADRSSCHSLYLYGVGCEMSATGNTTQMSVDHDE  |         |
| Goat       | KFLLKNKQADRSSCHFLIVYGVGCDVPSSGNTSQMSMDHDE  |         |
| Horse      | KFLLKNKQADRSSCHFLFLYGVGCDVPSSGNTSQMSMDHEE  |         |
| Chicken    | KFLLKNKQSDRTSCHFLFLYDV-----SGGGASQMSLDHEE  |         |
| Toad       | KFLLKYK-----                               |         |
| Fish       | KFLLKNK-----                               |         |

  

| <b>b</b>   |                                         | 1490               |
|------------|-----------------------------------------|--------------------|
|            |                                         | :*****:*****:***** |
| Human      | AVNHSLSFISDGNVLALHRLWNNQEKIGQYLSNRDHKAV |                    |
| Chimpanzee | AVNHSLSFISDGNVLALHRLWNNQEKIGQYLSNRDHKAV |                    |
| Rhesus     | AVNHSLSFISDGNVLALHRLWNNQEKIGQYLSNRDHKAV |                    |
| Bat        | AVNHSLSFISDGNVLALHRLWNNQEKIGQYLSNRDHKAV |                    |
| Dog        | TVNHSLSFISDGNVLALHRLWNNQEKIGQYLSNRDHKAV |                    |
| Rabbit     | AVNHSLSFISDGNVLALHRLWNNQEKIGQYLSNRDHKAV |                    |
| Mouse      | AVNHSLSFISDGNVLALHRLWNNQEKIGQYLSNRDHKAV |                    |
| Goat       | AVNHSLSFISDGNVLALHRLWNNQEKIGQYLSNRDHKAV |                    |
| Horse      | AVNHSLSFISDGNVLALHRLWNNQEKIGQYLSNRDHKAV |                    |
| Chicken    | TVNHSLSFISDGNVLALHRLWNNQEKIGQYLSNRDHKAV |                    |
| Toad       | TVNHSLSFITDGNVLALHRLWNNQEKIGQYLSNRDHKAV |                    |
| Fish       | SVNHSLSFISDGNVLALHRLWNNQERIGQYLSNRDHKAV |                    |

  

| <b>c</b>   |                                        | 1931                |
|------------|----------------------------------------|---------------------|
|            |                                        | ***** ***** .*****: |
| Human      | SGFSKSSIELKHLCEYMPWLSNLVRFCKHNDDAKRQRT |                     |
| Chimpanzee | SGFSKSSIELKHLCEYMPWLSNLVRFCKHNDDAKRQRT |                     |
| Rhesus     | SGFSKSSIELKHLCEYMPWLSNLVRFCKHNDDAKRQRT |                     |
| Bat        | SGFSKSSIELKHLCEYMPWLSNLVRFCKHNDDAKRQRT |                     |
| Dog        | SGFSKSSIELKHLCEYMPWLSNLVRFCKHNDDAKRQRT |                     |
| Rabbit     | SGFSKSSIELKHLCEYMPWLSNLVRFCKHNDDAKRQRT |                     |
| Mouse      | SGFSKSSIELKHLCEYMPWLSNLVRFCKHNDDAKRQRT |                     |
| Goat       | SGFSKSSIELKHLCEYMPWLSNLVRFCKHNDDAKRQRT |                     |
| Horse      | SGFSKSSIELKHLCEYMPWLSNLVRFCKHNDDAKRQRT |                     |
| Chicken    | SGFSKSSIELKHLCEYMPWLSNLVRFCKHNDDAKRQRT |                     |
| Toad       | SGFSKSSIELKHLCEYMPWLLNLVRFCKLTDDAKRQRT |                     |
| Fish       | SGFSKSSIELKHLCEYMPWLLNLVRFCKHNDDAKRQRT |                     |

**Fig. S3** Amino acid sequences of neurofibromin around missense mutations. Mutation sites are highlighted. **a:** The amino acid G629 and surrounding sequence; **b:** The amino acid L1490 and surrounding sequence; **c:** The amino acid W1931 and surrounding sequence

**Table S1** Primers used in this study

| Application         | Amplicon                  | Sequence (5'-3')             | T <sub>m</sub> (°C) | Size (bp) |
|---------------------|---------------------------|------------------------------|---------------------|-----------|
| Sanger Sequencing   | <i>NFI-E9-11</i>          | F: GAGTTTTAGAGGCTGTAAATTTGC  | 55                  | 2076      |
|                     |                           | R: GGCAAATGAGGTGAAGGGTT      | 60                  |           |
|                     | <i>NFI-E16</i>            | F: GTCTCTGCTGTGCATGTGGTTTATT | 59                  | 752       |
|                     |                           | R: ACAATATGCTCCTCAAGCTACTCTG | 59                  |           |
|                     | <i>NFI-E17</i>            | F: TAATGAATTCATAGTGCCCTGGTAG | 57                  | 969       |
|                     |                           | R: TGGGTTTTTTATGGAGTGGAG     | 54                  |           |
|                     | <i>NFI-E18</i>            | F: AGTTCTTGTTTATGCCCTTGTTTC  | 55                  | 776       |
|                     |                           | R: TGTGCTTTGAGGCAGACTGAGTA   | 58                  |           |
|                     | <i>NFI-E28-29</i>         | F: CTTTGGGTTTACATTTTTGCTACTC | 56                  | 897       |
|                     |                           | R: ATTACCTATTAGCCTCTTCCCTTC  | 57                  |           |
|                     | <i>NFI-E33-34</i>         | F: GCATAGGATTCATATTCTGGCACT  | 57                  | 2328      |
|                     |                           | R: CATTAACCTTTATGAGGGTTCTG   | 55                  |           |
|                     | <i>NFI-E36</i>            | F: CAGGGTTCCAGTTTGTCTATTTTC  | 57                  | 1528      |
|                     |                           | R: CATATCCTCCACAGGACCTCCAT   | 60                  |           |
|                     | <i>NFI-E37</i>            | F: TTAGGCTGGAAGTAGAAGAGTGT   | 57                  | 1521      |
|                     |                           | R: GAGTGATGTAGGTGGAAAGTATG   | 57                  |           |
| <i>NFI-E39</i>      | F: GTTCTTTCTTCGCCTCTACAA  | 54                           | 439                 |           |
|                     | R: GCTTTGCCCAATGTGGCACC   | 60                           |                     |           |
| <i>NFI-E40-41</i>   | F: TTCATATTGATTAGGCTGTTCC | 53                           | 919                 |           |
|                     | R: CACTGAGTATTCCGCTTATGG  | 56                           |                     |           |
| <i>NFI-E45</i>      | F: TCCGAGATTCAGTTTAGGAGTT | 54                           | 580                 |           |
|                     | R: ATCCATTCACTCCCCAACCT   | 55                           |                     |           |
| Mutation Validation | <i>NFI-Family 1</i>       | F: TTCTCATAGAAATAATCTGCTT    | 49                  | 131       |
|                     |                           | R: CCTTTTGGACTIONACATTGGT    | 56                  |           |
|                     | <i>NFI-Family 2</i>       | F: ACTGGTCAAATCAATGGTGATA    | 53                  | 101       |
|                     |                           | R: GTATGGGTAAGGTCCACTACAA    | 56                  |           |
|                     | <i>NFI-Family 3</i>       | F: AAGCCATTGTCCAGTCTATCA     | 54                  | 151       |
|                     |                           | R: CTCGGGTCAGAACTGCCTAA      | 62                  |           |

Abbreviation: T<sub>m</sub>: melting temperature calculated by Primer Premier 5 of the primer; E: exon; F: forward; R: reverse.

**Table S2** *In silico* analysis of missense mutations

| Mutation Position |                       | Exon 17                      | Exon 33                 | Exon 39                 |
|-------------------|-----------------------|------------------------------|-------------------------|-------------------------|
| Nucleotide Change |                       | c.1885G>A                    | c.4469T>C               | c.5791T>C               |
| Amino Acid Change |                       | p.G629R                      | p.L1490P                | p.W1931R                |
| UCSC              | dbSNP 147             | rs199474738                  | -                       | rs199474791             |
| Genome            | Allele Frequencies    | A: 0.002% (2 / 121202);      |                         | -                       |
| Browser           |                       | G: 99.998% (121200 / 121202) |                         |                         |
| ExAC              | Variant               | 17:29552152 G/A              |                         |                         |
|                   | Allele Count          | 2                            |                         |                         |
|                   | Allele Number         | 121202                       |                         |                         |
|                   | Number of Homozygotes | 0                            |                         |                         |
|                   | Allele Frequency      | 0.0000165                    |                         |                         |
| Prediction        | PolyPhen-2            | Probably Damaging            | Probably Damaging       | Probably Damaging       |
| Tool              | SIFT                  | Tolerated                    | Affect Protein Function | Affect Protein Function |
|                   | Mutation Taster       | Disease Causing              | Disease Causing         | Disease Causing         |
